# Supplementary material for: Facile synthesis of functionalizated carbon nanospheres for determination of Cu2+
Source: Royal Society of Chemistry journal article supplement (doi:10.1039/c3an36802e), 2013-01-01
Supplement: c3an36802e.pdf [file c3an36802e.pdf]

## Supplementary Information

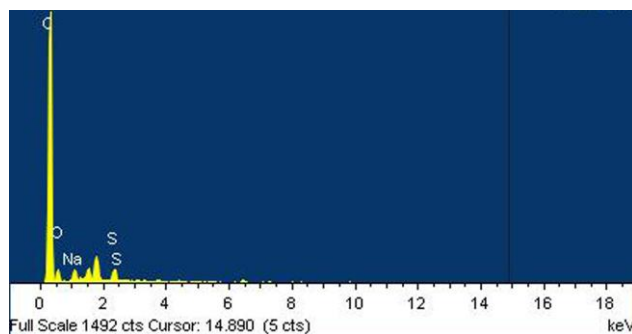

Fig. S1 EDS spectra of CNSs xanthate.

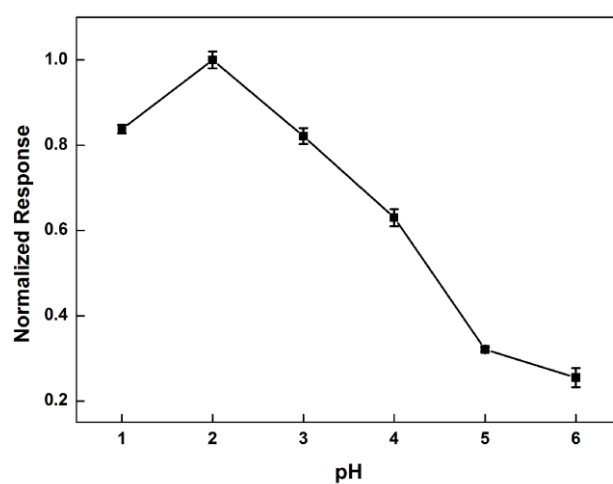

Fig. S2 Plots of SWSVs relative peak current against pH (deposition potential: -0.4 V, deposition time: 180s) obtained from the modified CPE for 2  $\mu\text{M}$   $\text{Cu}^{2+}$  in 0.01 M  $\text{HNO}_3$  solution.

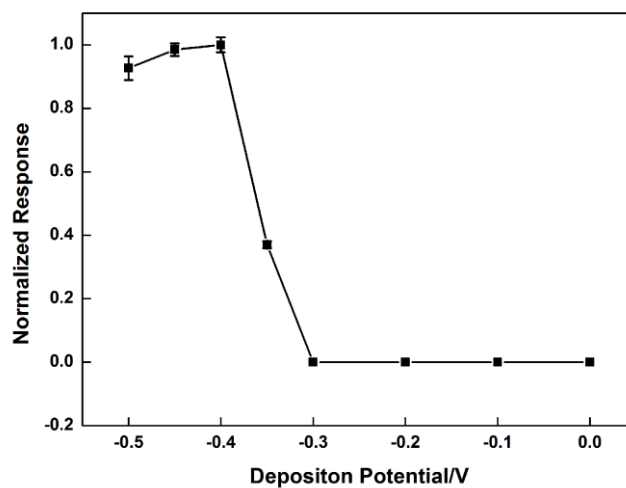

Fig. S3 Plots of SWSVs relative peak current against deposition potential (deposition time: 180s) obtained from the modified CPE for  $2 \mu\text{M Cu}^{2+}$  in  $0.01 \text{ M HNO}_3$  solution.

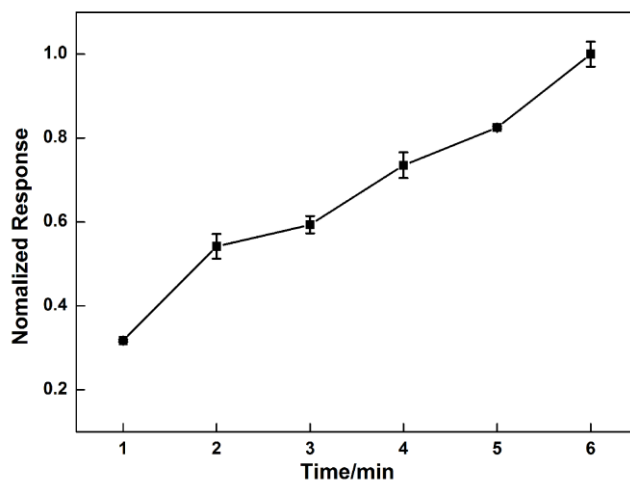

Fig. S4 Plots of SWSVs relative peak current against deposition time (deposition potential:  $-0.4 \text{ V}$ ) obtained from the modified CPE for  $2 \mu\text{M Cu}^{2+}$  in  $0.01 \text{ M HNO}_3$  solution.

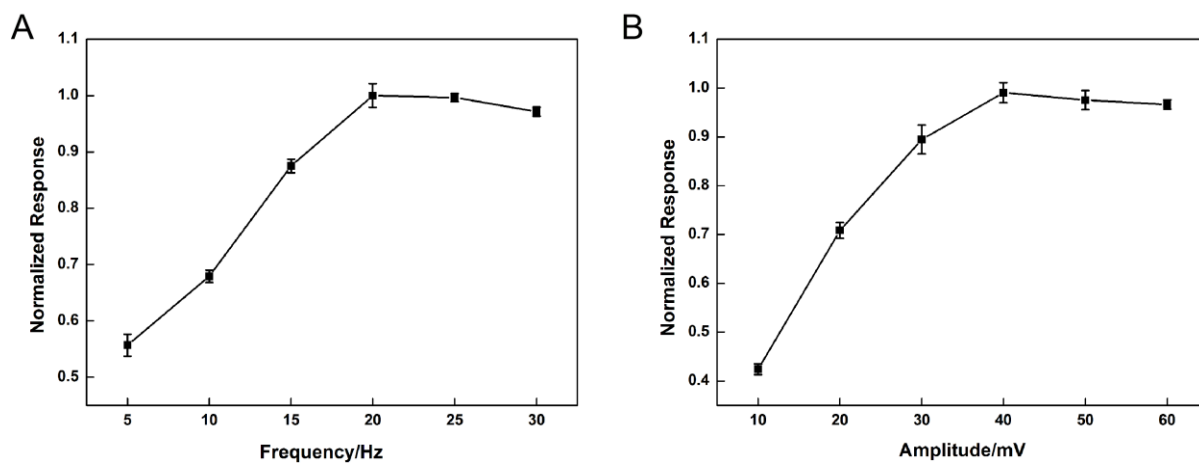

Fig. S5 Plots of SWSVs relative peak current against (A) frequency (amplitude:  $40 \text{ mV}$ ); (B) amplitude (frequency:  $20 \text{ Hz}$ ), respectively, obtained from the modified CPE for  $2 \mu\text{M Cu}^{2+}$  in  $0.01 \text{ M HNO}_3$  solution.
